# Supplementary material for: A Na2MoO2F4:Mn4+ phosphor with red luminescence peaking at 625 nm and a ZPL/v6 intensity ratio of 243%
Source: Royal Society of Chemistry journal article supplement (doi:10.1039/d3tc02609d), 2023-01-01
Supplement: d3tc02609d1.pdf [file d3tc02609d1.pdf]

## Supporting Information

### $\text{Na}_2\text{MoO}_2\text{F}_4:\text{Mn}^{4+}$ Phosphor with Red Luminescence Peaking at 625 nm and ZPL/ $\nu_6$ Intensity Ratio of 243%

Qiao Qu,<sup>a</sup> Konglan Chen,<sup>b</sup> Yayun Zhou,<sup>\*b</sup> Jinsheng Li,<sup>c</sup> and Haipeng Ji<sup>\*a</sup>

<sup>a</sup> School of Materials Science and Engineering, Zhengzhou University, Zhengzhou 450001, China

<sup>b</sup> Guangdong-Hong Kong-Macao Joint Laboratory for Intelligent Micro-Nano Optoelectronic Technology, School of Physics and Optoelectronic Engineering, Foshan University, Foshan 528225, China

<sup>c</sup> Key Laboratory of Dielectric and Electrolyte Functional Materials Hebei Province, School of Resources and Materials, Northeastern University at Qinhuangdao, Qinhuangdao 066004, China

#### Corresponding Authors

Yayun Zhou – [orcid.org/0000-0002-0952-1481](https://orcid.org/0000-0002-0952-1481); Email: [zhouyayun@fosu.edu.cn](mailto:zhouyayun@fosu.edu.cn)

Haipeng Ji – [orcid.org/0000-0003-2585-5665](https://orcid.org/0000-0003-2585-5665); Email: [jihp@zzu.edu.cn](mailto:jihp@zzu.edu.cn)

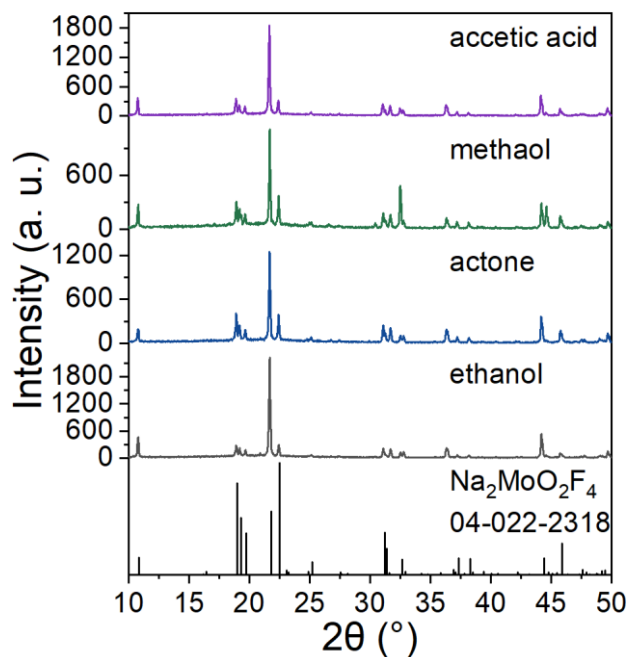

**Figure S1** The XRD patterns of  $\text{Na}_2\text{MoO}_2\text{F}_4:1.5\%\text{Mn}^{4+}$  phosphors with 5 mL organics.

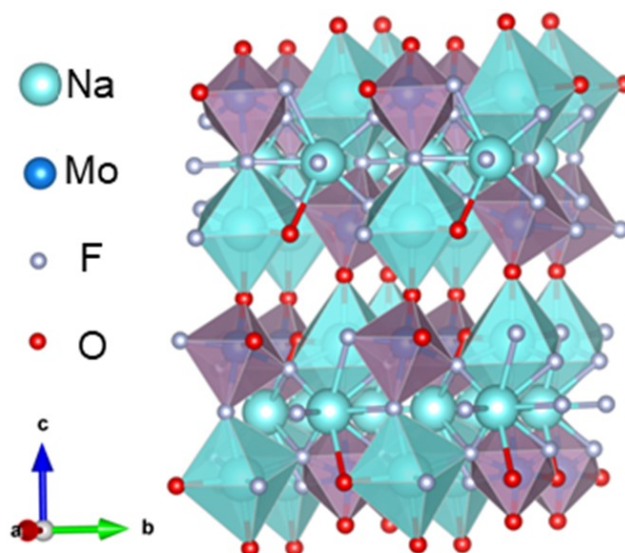

**Figure S2** Crystal structure of  $\text{Na}_2\text{MoO}_2\text{F}_4$  showing a  $2 \times 2 \times 1$  supercell.

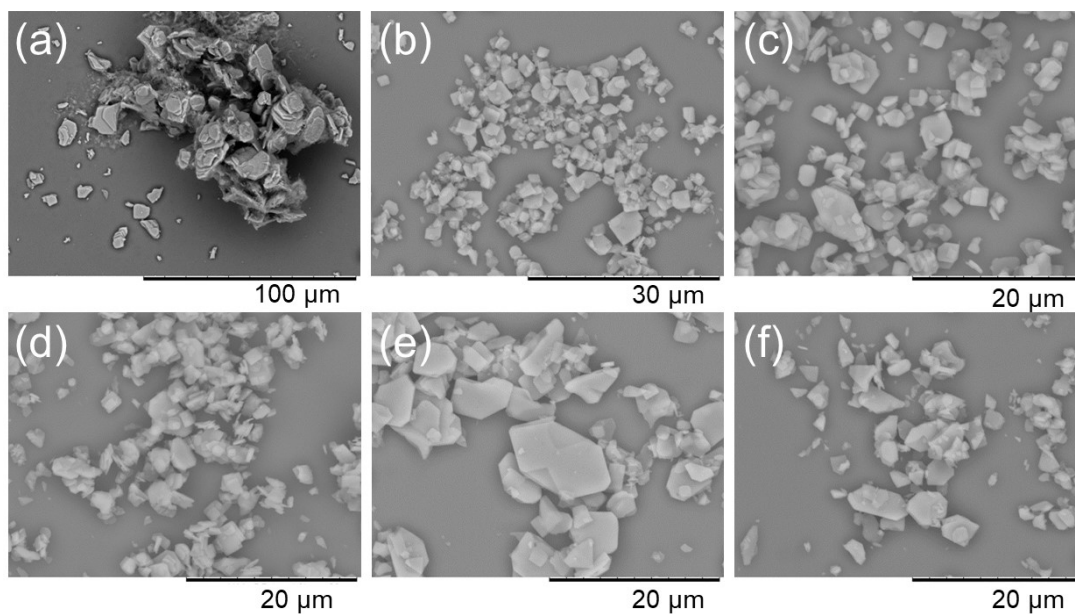

**Figure S3** SEM images of  $\text{Na}_2\text{MoO}_2\text{F}_4$  (a) and  $\text{Na}_2\text{Mo}_{1-x}\text{O}_2\text{F}_4:x\text{Mn}^{4+}$  (b~f correspond to  $x = 0.3\%$ ,  $0.6\%$ ,  $1.0\%$ ,  $1.5\%$ ,  $2.0\%$ , respectively).

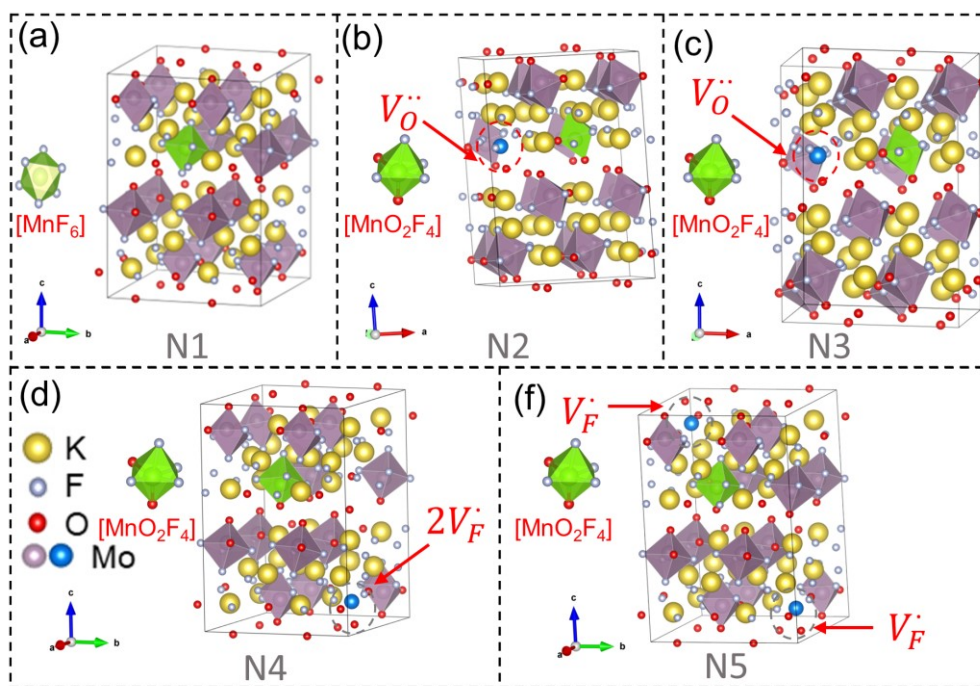

**Figure S4** Five possible occupation forms and possible charge compensation models of  $\text{Mn}^{4+}$  or  $[\text{MnF}_6]^{2-}$  doped in the  $\text{Na}_2\text{MoO}_2\text{F}_4$  host.

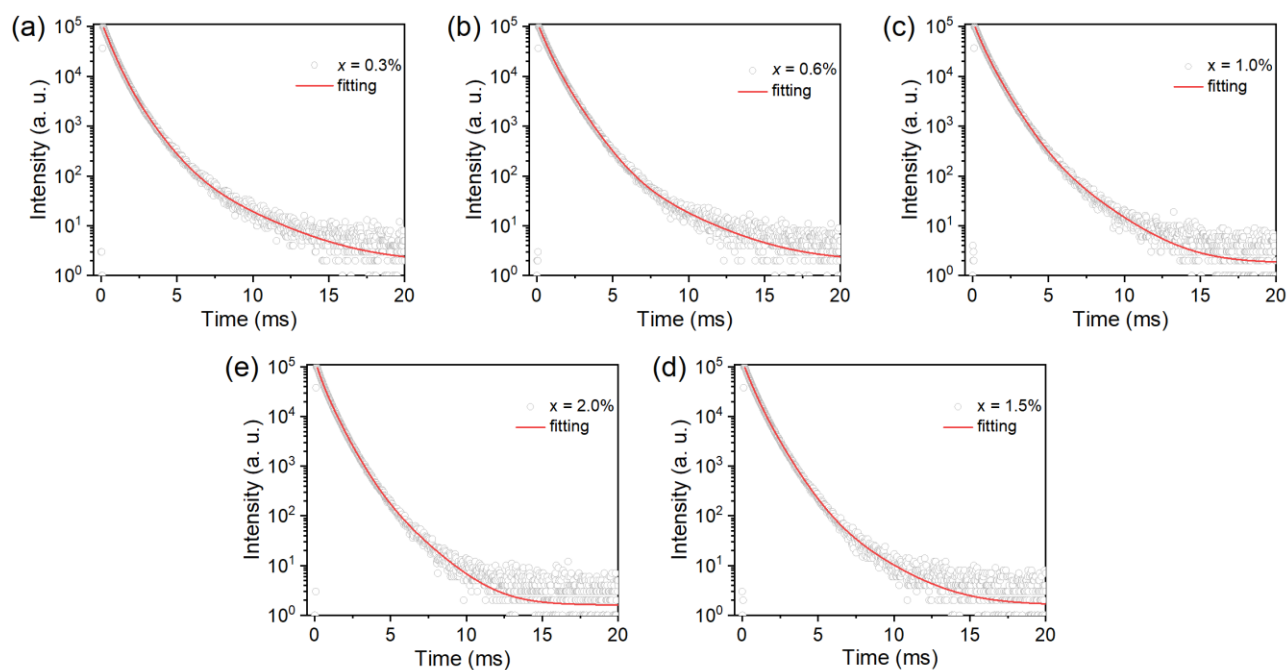

**Figure S5** Luminescence decay curves of  $\text{Na}_2\text{Mo}_{1-x}\text{O}_2\text{F}_4:x\text{Mn}^{4+}$  phosphors, with  $x$  ranging from 0.3% to 2.0% (a~e correspond to  $x = 0.3\%$ ,  $0.6\%$ ,  $1.0\%$ ,  $1.5\%$ ,  $2.0\%$ , respectively) monitored for 625 nm emission under 480 nm excitation.

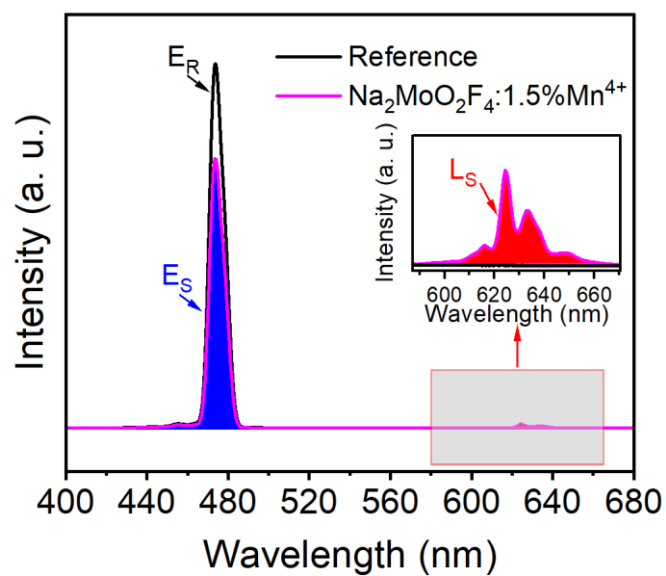

**Figure S6.** PL spectra (under 470 nm excitation) of  $\text{Na}_2\text{MoO}_2\text{F}_4:1.5\%\text{Mn}^{4+}$  and reference sample measured using an integrating sphere for quantum yield.

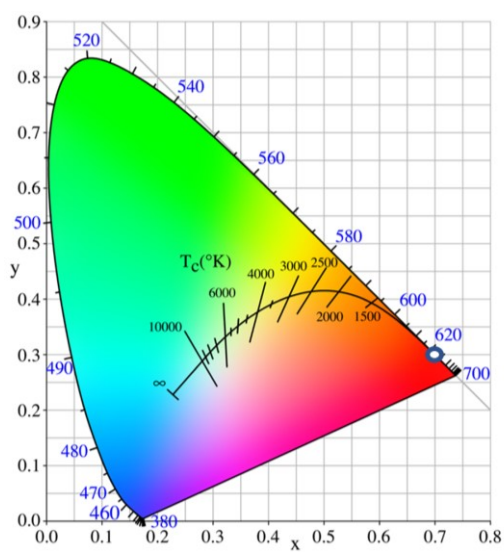

**Figure S7.** CIE chromaticity coordinate of  $\text{Na}_2\text{MoO}_2\text{F}_4:1.5\%\text{Mn}^{4+}$  red phosphor.

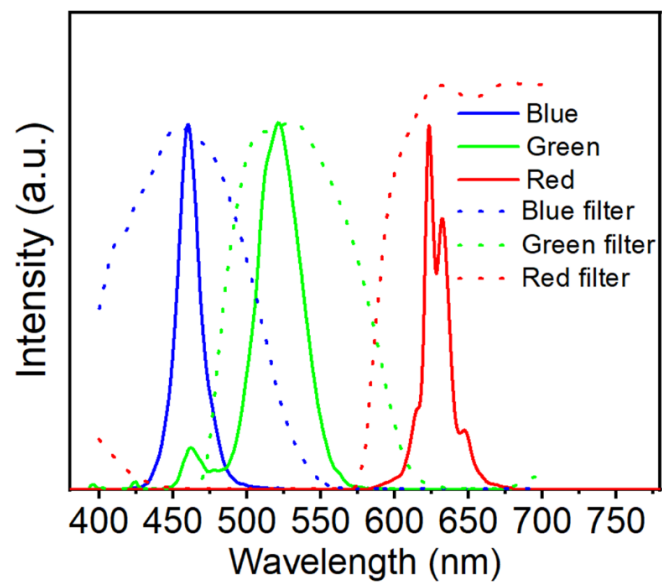

**Figure S8.** Transmission spectra of color filters (CFs) and RGB spectra of white LED after filtering by CFs.

**Table S1** Yield of  $\text{Na}_2\text{MoO}_2\text{F}_4 \cdot 1.5\% \text{Mn}^{4+}$  treated by different amount of acetic acid

| Usage (mL) | Yield |
|------------|-------|
| 4          | 87.7% |
| 5          | 89.9% |
| 6          | 89.7% |

**Table S2** Crystallographic parameters of  $\text{Na}_2\text{MoO}_2\text{F}_4$  from XRD Rietveld refinement

| Items                    | Parameters     |
|--------------------------|----------------|
| Space group              | $P 2_1/c$ (14) |
| Crystal structure        | Monoclinic     |
| $a$ (Å)                  | 5.50843        |
| $b$ (Å)                  | 5.72113        |
| $c$ (Å)                  | 16.40740       |
| $\alpha$ (°)             | 90             |
| $\beta$ (°)              | 91.46095       |
| $\gamma$ (°)             | 90             |
| Volume (Å <sup>3</sup> ) | 516.902106     |
| Mo–O1 (Å)                | 1.72481(5)     |
| Mo–O2 (Å)                | 1.77387(4)     |
| Mo–F1 (Å)                | 2.20214(6)     |
| Mo–F2 (Å)                | 2.08913(5)     |
| Mo–F3 (Å)                | 1.94605(5)     |
| Mo–F4 (Å)                | 1.91554(6)     |
| F3–Mo–O1 (°)             | 166.6487(5)    |
| F1–Mo–F4 (°)             | 158.9484(5)    |
| F1–Mo–O1 (°)             | 93.4231(8)     |
| F1–Mo–O2 (°)             | 99.984(2)      |
| F1–Mo–F2 (°)             | 81.189(2)      |
| F1–Mo–F3 (°)             | 84.8704(9)     |
| F2–Mo–O1 (°)             | 90.3483(17)    |
| F2–Mo–F3 (°)             | 76.3024(17)    |
| F2–Mo–F4 (°)             | 80.167(3)      |
| F3–Mo–O2 (°)             | 90.1127(17)    |
| F3–Mo–F4 (°)             | 81.3004(15)    |
| F4–Mo–O2 (°)             | 95.853(3)      |
| F4–Mo–O1 (°)             | 96.3753(14)    |
| O1–Mo–O2 (°)             | 103.2174(16)   |
| $R_{wp}$ (%)             | 9.76           |
| $R_p$ (%)                | 7.15           |
| $\chi^2$                 | 3.375          |

**Table S3** The calculated formation energy for the five possible charge compensation models of  $\text{Mn}^{4+}$  or  $[\text{MnF}_6]^{2-}$  doped in  $\text{Na}_2\text{MoO}_2\text{F}_4:\text{Mn}^{4+}$  ( $2 \times 1 \times 1$ )

| Model | Compounds                                                  | Replacement forms                                               | Formation energy (eV) |
|-------|------------------------------------------------------------|-----------------------------------------------------------------|-----------------------|
| N1    | $\text{Na}_{32}\text{Mo}_{15}\text{MnO}_{31}\text{F}_{66}$ | $[\text{MnF}_6]^{2-} \rightarrow [\text{MoO}_2\text{F}_4]^{2-}$ | 1.3353166             |
| N2    | $\text{Na}_{32}\text{Mo}_{15}\text{MnO}_{31}\text{F}_{64}$ | $\text{Mn}^{4+} \rightarrow \text{Mo}^{6+} - [\text{O1}]^{2-}$  | 7.57662195            |
| N3    | $\text{Na}_{32}\text{Mo}_{15}\text{MnO}_{31}\text{F}_{64}$ | $\text{Mn}^{4+} \rightarrow \text{Mo}^{6+} - [\text{O2}]^{2-}$  | 7.57613195            |
| N4    | $\text{Na}_{32}\text{Mo}_{15}\text{MnO}_{32}\text{F}_{62}$ | $\text{Mn}^{4+} \rightarrow \text{Mo}^{6+} - 2\text{F}^-$       | 11.7330173            |
| N5    | $\text{Na}_{32}\text{Mo}_{15}\text{MnO}_{32}\text{F}_{62}$ | $\text{Mn}^{4+} \rightarrow \text{Mo}^{6+} - 2\text{F}^-$       | 11.8512373            |

**Table S4** The bond angles and bond lengths of  $[\text{MnF}_6]^{2-}$  in optimized  $\text{Na}_2\text{MoO}_2\text{F}_4:\text{Mn}^{4+}$

| Bond angles |             | Bond lengths |              |
|-------------|-------------|--------------|--------------|
| F1–Mn–F2    | 91.8161(0)° | Mn–F1        | 1.86478(0) Å |
| F1–Mn–F3    | 93.3196(0)° | Mn–F2        | 1.88076(0) Å |
| F1–Mn–F5    | 87.6277(0)° | Mn–F3        | 1.85207(0) Å |
| F1–Mn–F6    | 91.9649(0)° | Mn–F4        | 1.81428(0) Å |
| F2–Mn–F3    | 92.8185(0)° | Mn–F5        | 1.82007(0) Å |
| F2–Mn–F4    | 87.5813(0)° | Mn–F6        | 1.78747(0) Å |
| F2–Mn–F5    | 87.0029(0)° |              |              |
| F3–Mn–F4    | 92.1307(0)° |              |              |
| F3–Mn–F6    | 90.9532(0)° |              |              |
| F4–Mn–F5    | 86.9212(0)° |              |              |
| F4–Mn–F6    | 88.2754(0)° |              |              |
| F5–Mn–F6    | 89.1596(0)° |              |              |

**Table S5** The fluorescence lifetime and structure of typical Mn<sup>4+</sup>-doped (oxy)fluoride phosphors.

| Phosphors                                                                           | Lifetime(ms) | ZPL    | Structure    | Space group             | Conc.(mol %) | Ref. |
|-------------------------------------------------------------------------------------|--------------|--------|--------------|-------------------------|--------------|------|
| Na <sub>2</sub> SiF <sub>6</sub> :Mn <sup>4+</sup>                                  | 5.80         | Strong | Trigonal     | $D_3^2 - P321$          | –            | 1    |
| K <sub>2</sub> SiF <sub>6</sub> :Mn <sup>4+</sup>                                   | 8.30         | weak   | Cubic        | $O_h^5 - Fm\bar{3}m$    | –            | 2    |
| K <sub>3</sub> SiF <sub>7</sub> :Mn <sup>4+</sup>                                   | 5.80         | Weak   | Tetragonal   | P4/mbm                  | 1            | 3    |
| Rb <sub>2</sub> SiF <sub>6</sub> :Mn <sup>4+</sup>                                  | 8.26         | Weak   | Cubic        | $O_h^5 - Fm\bar{3}m$    | –            | 4    |
| Rb <sub>3</sub> SiF <sub>7</sub> :Mn <sup>4+</sup>                                  | 5.38         | Weak   | Tetragonal   | P4/mbm                  | 1            | 3    |
| Cs <sub>2</sub> SiF <sub>6</sub> :Mn <sup>4+</sup>                                  | 7.81         | Weak   | Cubic        | $O_h^5 - Fm\bar{3}m$    | 10.75        | 5    |
| Na <sub>2</sub> GeF <sub>6</sub> :Mn <sup>4+</sup>                                  | 6.58         | Strong | Trigonal     | $D_3^2 - P321$          | <10          | 6    |
| K <sub>2</sub> GeF <sub>6</sub> :Mn <sup>4+</sup>                                   | 6.68         | Weak   | Trigonal     | $D_{3d}^3 - P\bar{3}m1$ | <3           | 6    |
| Rb <sub>2</sub> GeF <sub>6</sub> :Mn <sup>4+</sup>                                  | 6.02         | Weak   | Trigonal     | $D_{3d}^3 - P\bar{3}m1$ | <0.8         | 6    |
| Rb <sub>2</sub> GeF <sub>6</sub> :Mn <sup>4+</sup>                                  | 5.8          | Strong | Hexagonal    | $C_{6v}^4 - P63mc$      | –            | 7    |
| Cs <sub>2</sub> GeF <sub>6</sub> :Mn <sup>4+</sup>                                  | 7.52         | Weak   | Cubic        | $O_h^5 - Fm\bar{3}m$    | <3           | 6    |
| K <sub>2</sub> TiF <sub>6</sub> :Mn <sup>4+</sup>                                   | 5.70         | Weak   | Trigonal     | $D_{3d}^3 - P\bar{3}m1$ | 5.5          | 8    |
| Rb <sub>2</sub> TiF <sub>6</sub> :Mn <sup>4+</sup>                                  | 5.20         | Weak   | Trigonal     | $D_{3d}^3 - P\bar{3}m1$ | –            | 9    |
| Na <sub>3</sub> AlF <sub>6</sub> :Mn <sup>4+</sup>                                  | 4.68         | Strong | Monoclinic   | $C_{2h}^5 - P21/c$      | 1.58         | 10   |
| K <sub>3</sub> AlF <sub>6</sub> :Mn <sup>4+</sup>                                   | 3.50         | Strong | Cubic        | $O_h^5 - Fm\bar{3}m$    | 3.41         | 11   |
| K <sub>2</sub> NaAlF <sub>6</sub> :Mn <sup>4+</sup>                                 | 6.63         | Strong | Cubic        | $O_h^5 - Fm\bar{3}m$    | 2.03         | 12   |
| Cs <sub>3</sub> AlF <sub>6</sub> :Mn <sup>4+</sup>                                  | 2.83         | Weak   | Cubic        | $O_h^5 - Fm\bar{3}m$    | 1.83         | 13   |
| K <sub>2</sub> NaGaF <sub>6</sub> :Mn <sup>4+</sup>                                 | 5.68         | Strong | Cubic        | $O_h^5 - Fm\bar{3}m$    | –            | 14   |
| K <sub>2</sub> NbF <sub>7</sub> :Mn <sup>4+</sup>                                   | 3.62         | Strong | Monoclinic   | $C_{2h}^5 - P21/c$      | <1           | 15   |
| KTeF <sub>5</sub> :Mn <sup>4+</sup>                                                 | 3.29         | Medium | Orthorhombic | $D_{2h}^{11} - Pbcm$    | 0.23         | 16   |
| Na <sub>2</sub> WO <sub>2</sub> F <sub>4</sub> :Mn <sup>4+</sup>                    | 2.59         | Strong | Orthorhombic | $D_{2h}^{14} - Pbcn$    | 0.5          | 17   |
| LiAl <sub>4</sub> O <sub>6</sub> F:Mn <sup>4+</sup>                                 | 0.24~3.5     | –      | Cubic        | –                       | –            | 18   |
| LiNaWO <sub>2</sub> F <sub>4</sub> :Mn <sup>4+</sup>                                | 1.21         | Strong | Orthorhombic | $D_{2h}^{14} - Pbcn$    | 2            | 19   |
| KNaWO <sub>2</sub> F <sub>4</sub> :Mn <sup>4+</sup>                                 | 2.02         | Strong | Orthorhombic | $D_{2h}^{14} - Pbcn$    | 4            | 19   |
| Rb <sub>2</sub> WO <sub>2</sub> F <sub>4</sub> :Mn <sup>4+</sup>                    | 2.15         | Weak   | Trigonal     | $D_{3d}^3 - P\bar{3}m1$ | 11           | 20   |
| Cs <sub>2</sub> WO <sub>2</sub> F <sub>4</sub> :Mn <sup>4+</sup>                    | 3.2          | Weak   | Trigonal     | $D_{3d}^3 - P\bar{3}m1$ | 5            | 21   |
| K <sub>3</sub> WOF <sub>7</sub> :Mn <sup>4+</sup>                                   | –            | Medium | Monoclinic   | $C_{2h}^5 - P21/c$      | –            | 22   |
| K <sub>2</sub> [MoO <sub>2</sub> F <sub>4</sub> ]·H <sub>2</sub> O:Mn <sup>4+</sup> | 3.78         | Medium | Monoclinic   | $C_{2h}^5 - P21/c$      | 3.28         | 23   |
| Cs <sub>2</sub> MoO <sub>2</sub> F <sub>4</sub> :Mn <sup>4+</sup>                   | 1.95         | Medium | Orthorhombic | Amam                    | 1.12         | 24   |
| Rb <sub>2</sub> MoO <sub>2</sub> F <sub>4</sub> :Mn <sup>4+</sup>                   | 3.66         | Medium | Orthorhombic | Amam                    | 5            | 25   |
| CsMoO <sub>2</sub> F <sub>3</sub> :Mn <sup>4+</sup>                                 | 1.88         | Weak   | Orthorhombic | $D_{2h}^{28} - Imma$    | 3.88         | 26   |
| Cs <sub>2</sub> NbOF <sub>5</sub> :Mn <sup>4+</sup>                                 | 3.23         | Weak   | Trigonal     | $C_3^1 - P3$            | 6.98         | 27   |
| Rb <sub>2</sub> NbOF <sub>5</sub> :Mn <sup>4+</sup>                                 | 4.73         | Weak   | Trigonal     | $C_3^1 - P3$            | 1            | 28   |
| Na <sub>2</sub> NbOF <sub>5</sub> :Mn <sup>4+</sup>                                 | 3.32         | Strong | Orthorhombic | Pbcn(60)                | 0.3          | 29   |
| BaNbOF <sub>5</sub> :Mn <sup>4+</sup>                                               | –            | Strong | Cubic        | $T_h^6 - Pa\bar{3}$     | 6            | 30   |
| K <sub>3</sub> TaO <sub>2</sub> F <sub>4</sub> :Mn <sup>4+</sup>                    | 4.24         | Medium | Cubic        | $O_h^5 - Fm\bar{3}m$    | 6.92         | 31   |



**Table S6** The CIE1931 color coordinates of the red, green and blue components of this WLED incorporating  $\beta$ -SiAlON:Eu<sup>2+</sup>, Na<sub>2</sub>MoO<sub>2</sub>F<sub>4</sub>:1.5%Mn<sup>4+</sup> phosphor, and an InGaN chip at

| 20 mA current |       |       |       |       |
|---------------|-------|-------|-------|-------|
| CIE           | White | Red   | Green | Blue  |
| <i>x</i>      | 0.295 | 0.673 | 0.141 | 0.141 |
| <i>y</i>      | 0.313 | 0.292 | 0.683 | 0.039 |

**Calculation for crystal field strength and Racah parameters:**

The crystal-field strength (*Dq*) of Mn<sup>4+</sup> can be roughly estimated by the peak energy of <sup>4</sup>A<sub>2g</sub>→<sup>4</sup>T<sub>2g</sub> transition<sup>32</sup>:

$$Dq = E(^4A_{2g} \rightarrow ^4T_{2g})/10$$

Based on the peak energy difference between <sup>4</sup>A<sub>2g</sub>→<sup>4</sup>T<sub>1g</sub> and <sup>4</sup>A<sub>2g</sub>→<sup>4</sup>T<sub>2g</sub>, the Racah parameter B can be calculated by the following equation<sup>32</sup>:

$$\frac{Dq}{B} = \frac{15(x - 8)}{(x^2 - 10x)}$$

where the parameter *x* is defined as

$$x = \frac{E(^4A_{2g} \rightarrow ^4T_{1g}) - E(^4A_{2g} \rightarrow ^4T_{2g})}{Dq}$$

According to the peak energy for Mn<sup>4+</sup>: <sup>2</sup>E<sub>g</sub>→<sup>4</sup>A<sub>2g</sub> transition, the Racah parameter C is evaluated by the following equation {Henderson, 1989 #1015}:<sup>32</sup>

$$\frac{E(^2E_g \rightarrow ^4A_{2g})}{B} = \frac{3.05C}{B} - \frac{1.8B}{Dq} + 7.9$$

**Calculation for IQE, AE and EQE:**

The internal quantum efficiency (IQE), absorption efficiency (AE) and external quantum efficiency (EQE) of the Na<sub>2</sub>MoO<sub>2</sub>F<sub>4</sub>:1.5%Mn<sup>4+</sup> were measured to be 7.6%, 26.29% and 2%, respectively. The IQE (termed as  $\eta_{int}$ ) was calculated by using the following equation :<sup>33</sup>

$$\eta_{int} = \frac{\int L_S}{\int E_R - \int E_S}$$

where *L<sub>S</sub>* is the emission spectrum of the sample, and *E<sub>S</sub>* and *E<sub>R</sub>* stand for the excitation spectra of the excitation light used for exciting the sample and without the sample in the integrating sphere, respectively. The AE of the sample,  $\epsilon_{abs}$ , was calculated via the expression:

$$\varepsilon_{abs} = \frac{\int E_R - \int E_S}{\int E_R}$$

The EQE ( $\eta_{ext}$ ) was determined via the equation:

$$\eta_{ext} = \varepsilon_{abs} \times \eta_{int}$$

## Reference

- 1 H.D. Nguyen, C. C. Lin, M.H. Fang and R.S. Liu, *J. Mater. Chem. C*, 2014, **2**, 10268–10272.
- 2 J. W. Moon, B. G. Min, J. S. Kim, M. S. Jang, K. M. Ok, K.Y. Han and J. S. Yoo, *Opt. Mater. Express*, 2016, **6**.
- 3 M. Kim, W. B. Park, J.W. Lee, J. Lee, C. H. Kim, S. P. Singh and K.-S. Sohn, *Chem. Mater.*, 2018, **30**, 6936–6944.
- 4 M.-H. Fang, H.D. Nguyen, C. C. Lin and R.S. Liu, *J. Mater. Chem. C*, 2015, **3**, 7277–7280.
- 5 E. Song, Y. Zhou, X. Yang, Z. Liao, W. Zhao, T. Deng, L. Wang, Y. Ma, S. Ye and Q. Zhang, *ACS Photonics*, 2017, **4**, 2556–2565.
- 6 H. Lian, Q. Huang, Y. Chen, K. Li, S. Liang, M. Shang, M. Liu and J. Lin, *Inorg. Chem.*, 2017, **56**, 11900–11910.
- 7 S. Sakurai, T. Nakamura and S. Adachi, *Jpn. J. Appl. Phys.*, 2018, **57**.
- 8 H. Zhu, C. C. Lin, W. Luo, S. Shu, Z. Liu, Y. Liu, J. Kong, E. Ma, Y. Cao, R. S. Liu and X. Chen, *Nat. Commun.*, 2014, **5**, 4312.
- 9 S. Sakurai, T. Nakamura and S. Adachi, *ECS J. Solid State Sci Technol.*, 2016, **5**, R206–R210.
- 10 E. H. Song, J. Q. Wang, S. Ye, X. F. Jiang, M. Y. Peng and Q. Y. Zhang, *J. Mater. Chem. C*, 2016, **4**, 2480–2487.
- 11 E. Song, J. Wang, J. Shi, T. Deng, S. Ye, M. Peng, J. Wang, L. Wondraczek and Q. Zhang, *ACS Appl Mater Interfaces*, 2017, **9**, 8805–8812.
- 12 L. Y. Wang, E. H. Song, T. T. Deng, Y. Y. Zhou, Z. F. Liao, W. R. Zhao, B. Zhou and Q. Y. Zhang, *Dalton Trans.*, 2017, **46**, 9925–9933.
- 13 H. Ming, L. Liu, S. He, J. Peng, F. Du, J. Fu, F. Yang and X. Ye, *J. Mater. Chem. C*, 2019, **7**, 7237–7248.
- 14 C. Jiang, M. G. Brik, L. Li, L. Li, J. Peng, J. Wu, M. S. Molokeev, K.-L. Wong and M. Peng, *J. Mater. Chem. C*, 2018, **6**, 3016–3025.
- 15 H. Lin, T. Hu, Q. Huang, Y. Cheng, B. Wang, J. Xu, J. Wang and Y. Wang, *Laser Photonics Rev.*, 2017, **11**.
- 16 T. T. Deng, E. H. Song, J. Su, Y. Y. Zhou, L. Y. Wang, S. Ye and Q. Y. Zhang, *J. Mater. Chem. C*, 2018, **6**, 4418–4426.
- 17 T. Hu, H. Lin, Y. Cheng, Q. Huang, J. Xu, Y. Gao, J. Wang and Y. Wang, *J. Mater. Chem. C*, 2017, **5**, 10524–10532.
- 18 N. Khaidukov, M. Brekhovskikh, G. Toci, B. Patrizi, M. Vannini, A. Pirri and V. Makhov, *J. Lumin.*, 2019, **216**, 116754–116754.
- 19 M. Hu, Z. Liu, Y. Xia, G. Zhang, Y. Fang, Y. Liu, G. Zhao and J. Hou, *J. Mater. Sci. Mater. Electron.*, 2020, **31**, 4535–4541.
- 20 S. Tang, Y. Liu, H. Li, Q. Zhou, K. Wang, H. Tang and Z. Wang, *J. Lumin.*, 2020, **224**,

- 117291–117291.
- 21 P. Cai, L. Qin, C. Chen, J. Wang and H. J. Seo, *Dalton Trans.*, 2017, **46**, 14331–14340.
  - 22 C. Stoll, G. Heymann, M. Seibald, D. Baumann and H. Huppertz, *J. Fluorine Chem.*, 2019, **226**.
  - 23 Y. Liu, H. Li, S. Tang, Q. Zhou, K. Wang, H. Tang and Z. Wang, *Mater. Res. Bull.*, 2020, **122**.
  - 24 S. He, L. Yao, W. Cai, D. Wu, J. Peng and X. Ye, *Dalton Trans.*, 2020, **49**, 11290–11299.
  - 25 Y. Zhou, H. Ming, S. Zhang, T. Deng, E. Song and Q. Zhang, *Chem. Eng. J.*, 2021, **415**, 128974.
  - 26 S. He, F. Xu, T. Han, Z. Lu, W. Wang, J. Peng, F. Du, F. Yang and X. Ye, *Chem. Eng. J.*, 2020, **392**, 123657–123657.
  - 27 J. Zhou, Y. Chen, C. Jiang, B. Milićević, M. S. Molokeev, M. G. Brik, I. A. Bobrikov, J. Yan, J. Li and M. Wu, *Chem. Eng. J.*, 2021, **405**.
  - 28 Z. Wang, Z. Yang, Z. Yang, Q. Wei, Q. Zhou, L. Ma and X. Wang, *Inorg. Chem.*, 2019, **58**, 456–461.
  - 29 J. Hou, W. Yin, L. Dong, Y. Li, Y. Liu, Z. Liu, G. Zhao, G. Zhang and Y. Fang, *Materials (Basel, Switzerland)*, 2021, **14**.
  - 30 X. Dong, Y. Pan, D. Li, H. Lian and J. Lin, *CrystEngComm*, 2018, **20**, 5641–5646.
  - 31 Y. Zhou, S. Zhang, X. Wang and H. Jiao, *Inorg. Chem.*, 2019, **58**, 4412–4419.
  - 32 B. Henderson and G. F. Imbusch, *Optical spectroscopy of inorganic solids*, Oxford University Press, 2006.
  - 33 Q. Dong, P. Xiong, J. Yang, Y. Fu, W. Chen, F. Yang, Z. Ma and M. Peng, *J. Alloys Compd.*, 2021, **885**, 160960.
